# Supplementary material
Source: publisher site journal article supplement (https://www.dovepress.com/get_supplementary_file.php?f=455936.docx)
Supplement: Supplementary file 1 [file get_supplementary_file.php]

*Supporting Information*

**Chemodynamic PtMn nanocubes for effective photothermal ROS storm a key anti-tumor therapy In-vivo**

*Chen Wang1*, Hongmei Zhou1*, Mekhrdod S. Kurboniyon2, Yanping Tang1, Zhengmin Cai1, Shufang Ning1, Litu Zhang1 and Xinqiang Liang1*

1Department of Research & Guangxi Cancer Molecular Medicine Engineering Research Center & Guangxi Key Laboratory of Basic and Translational Research for Colorectal Cancer, Guangxi Medical University Cancer Hospital, Nanning, China; 2National Academy of Sciences of Tajikistan, Dushanbe, Tajikistan

*These authors contributed equally to this work

Correspondence: Litu Zhang and Xinqiang Liang

Department of Research and Guangxi Cancer Molecular Medicine Engineering Research Center and Guangxi Key Laboratory of Basic and Translational Research for Colorectal Cancer, Guangxi Medical University Cancer Hospital, Nanning, China

Email: zhanglitu@gmail.com and xx03716@163.com

**
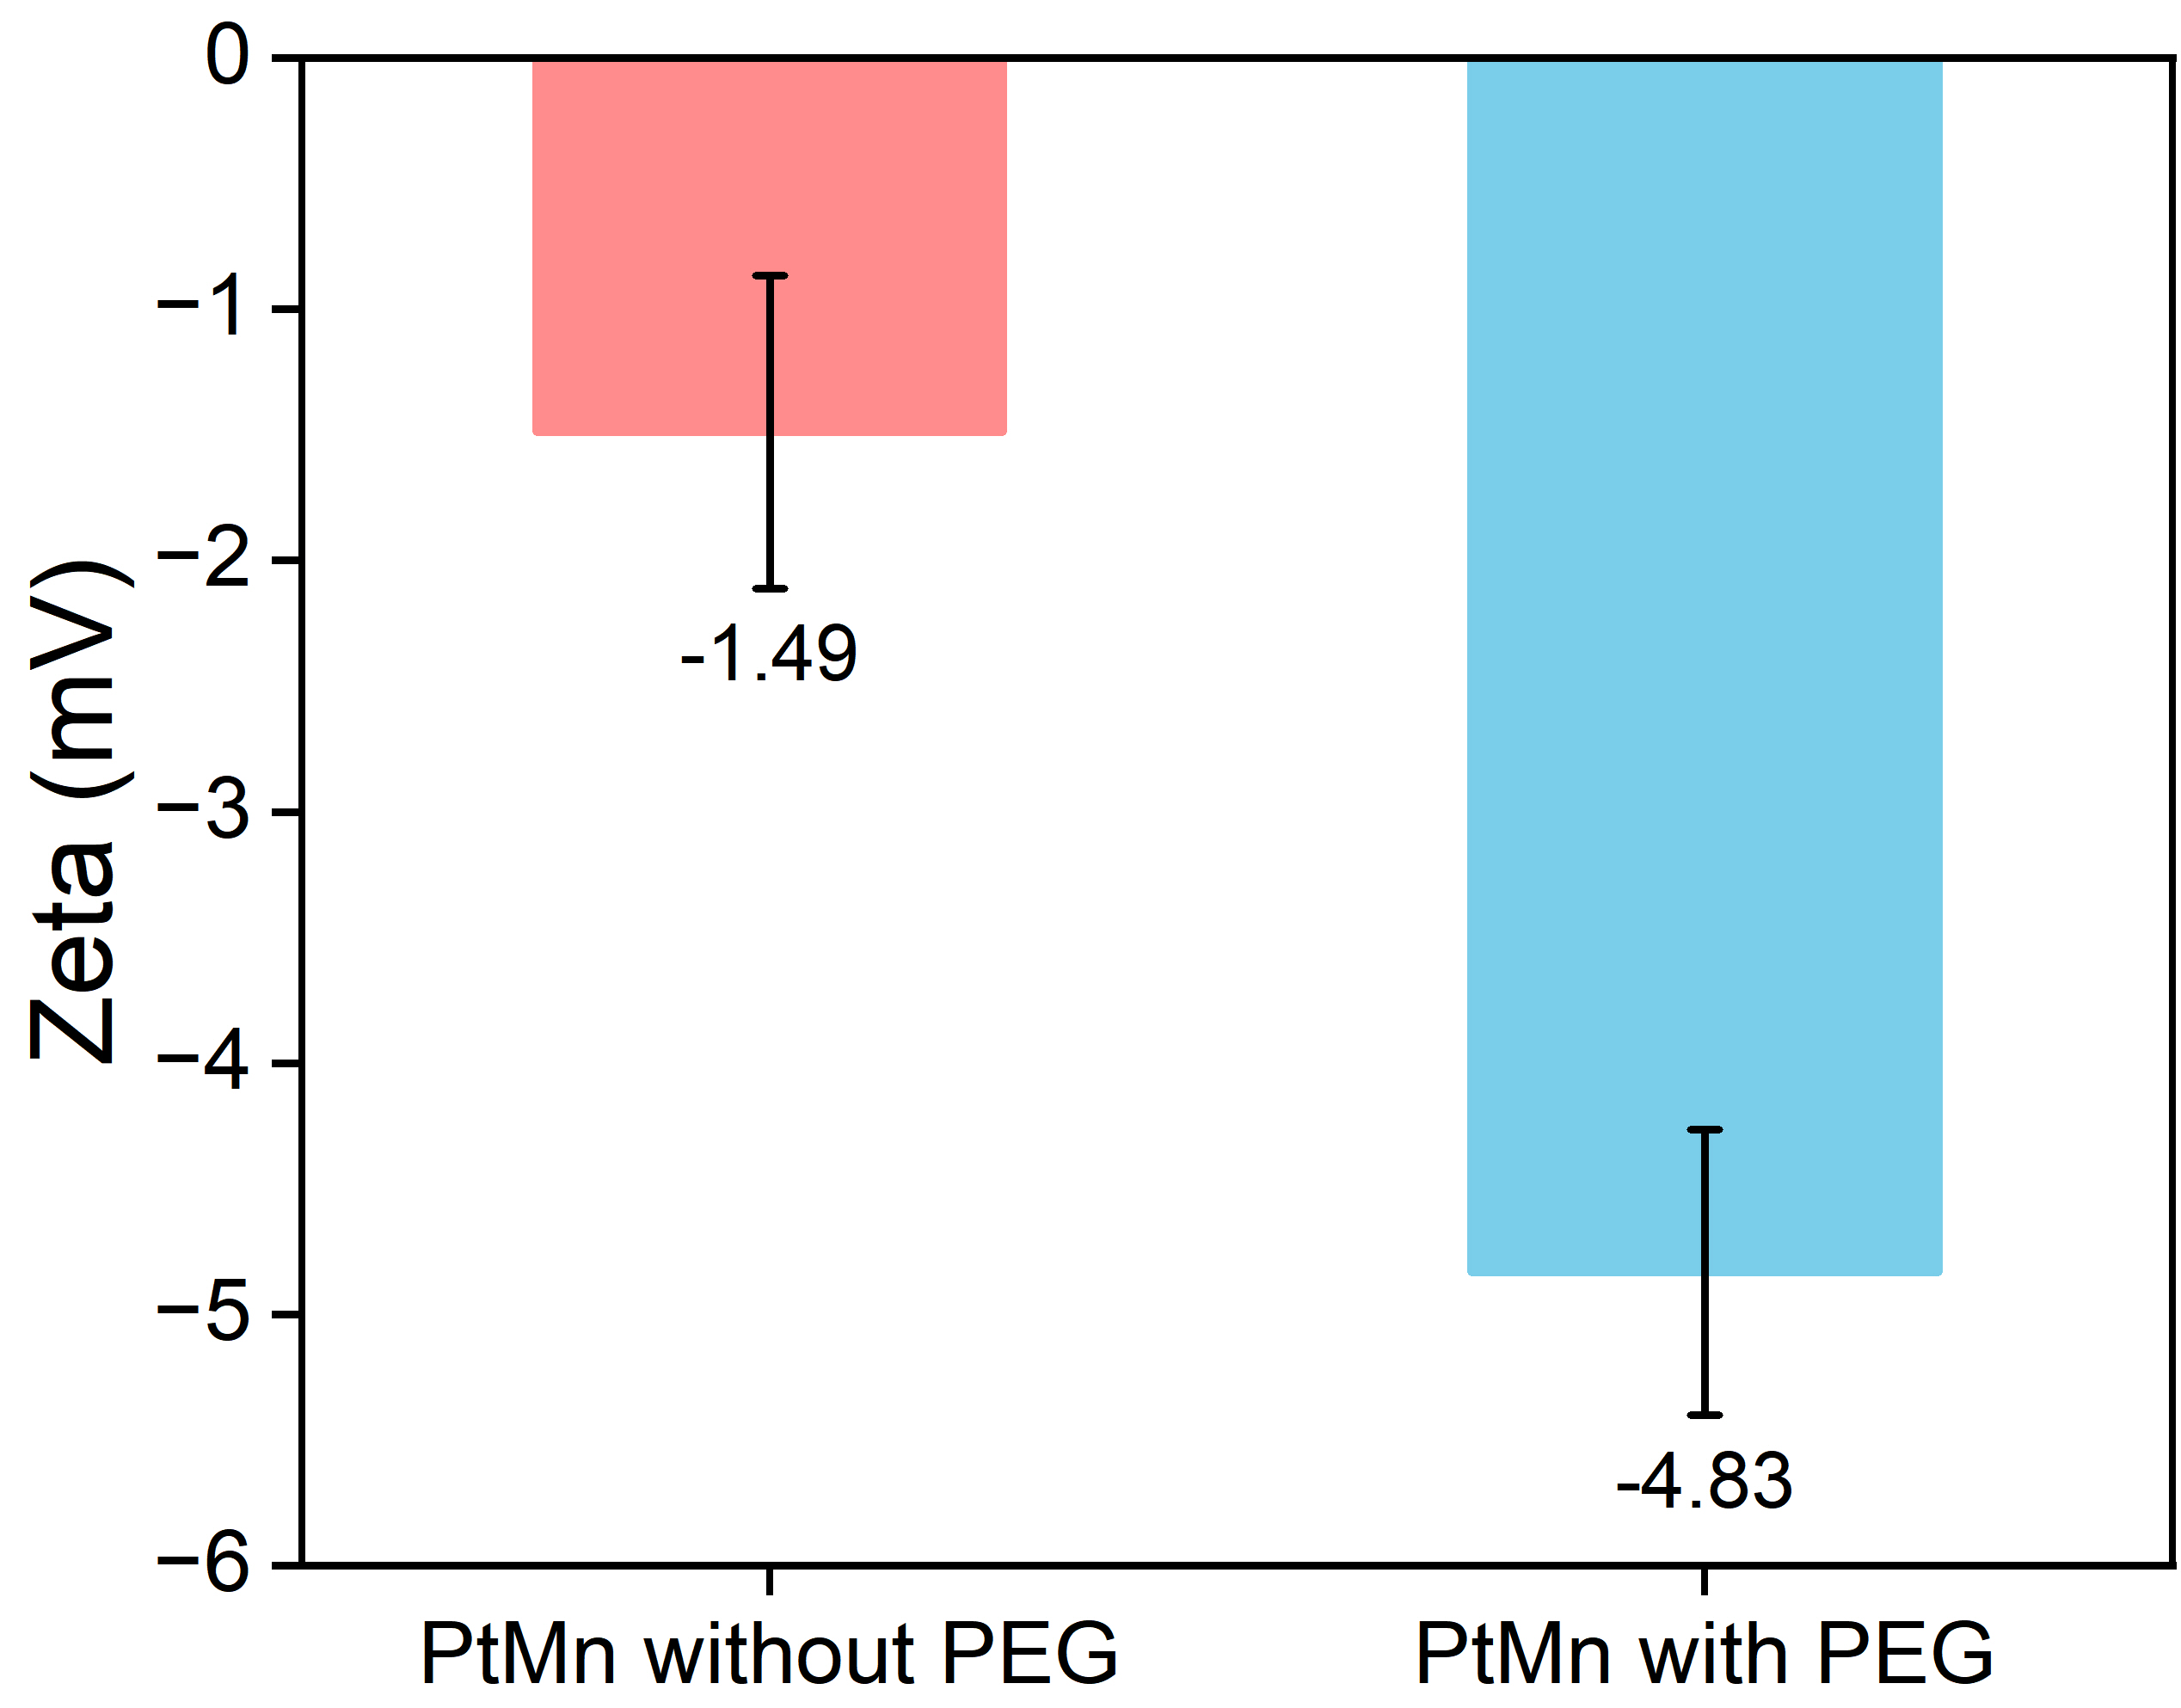
**

**Figure S1.** The zeta potentials of PtMn without PEG modification and PtMn with PEG modification.

**
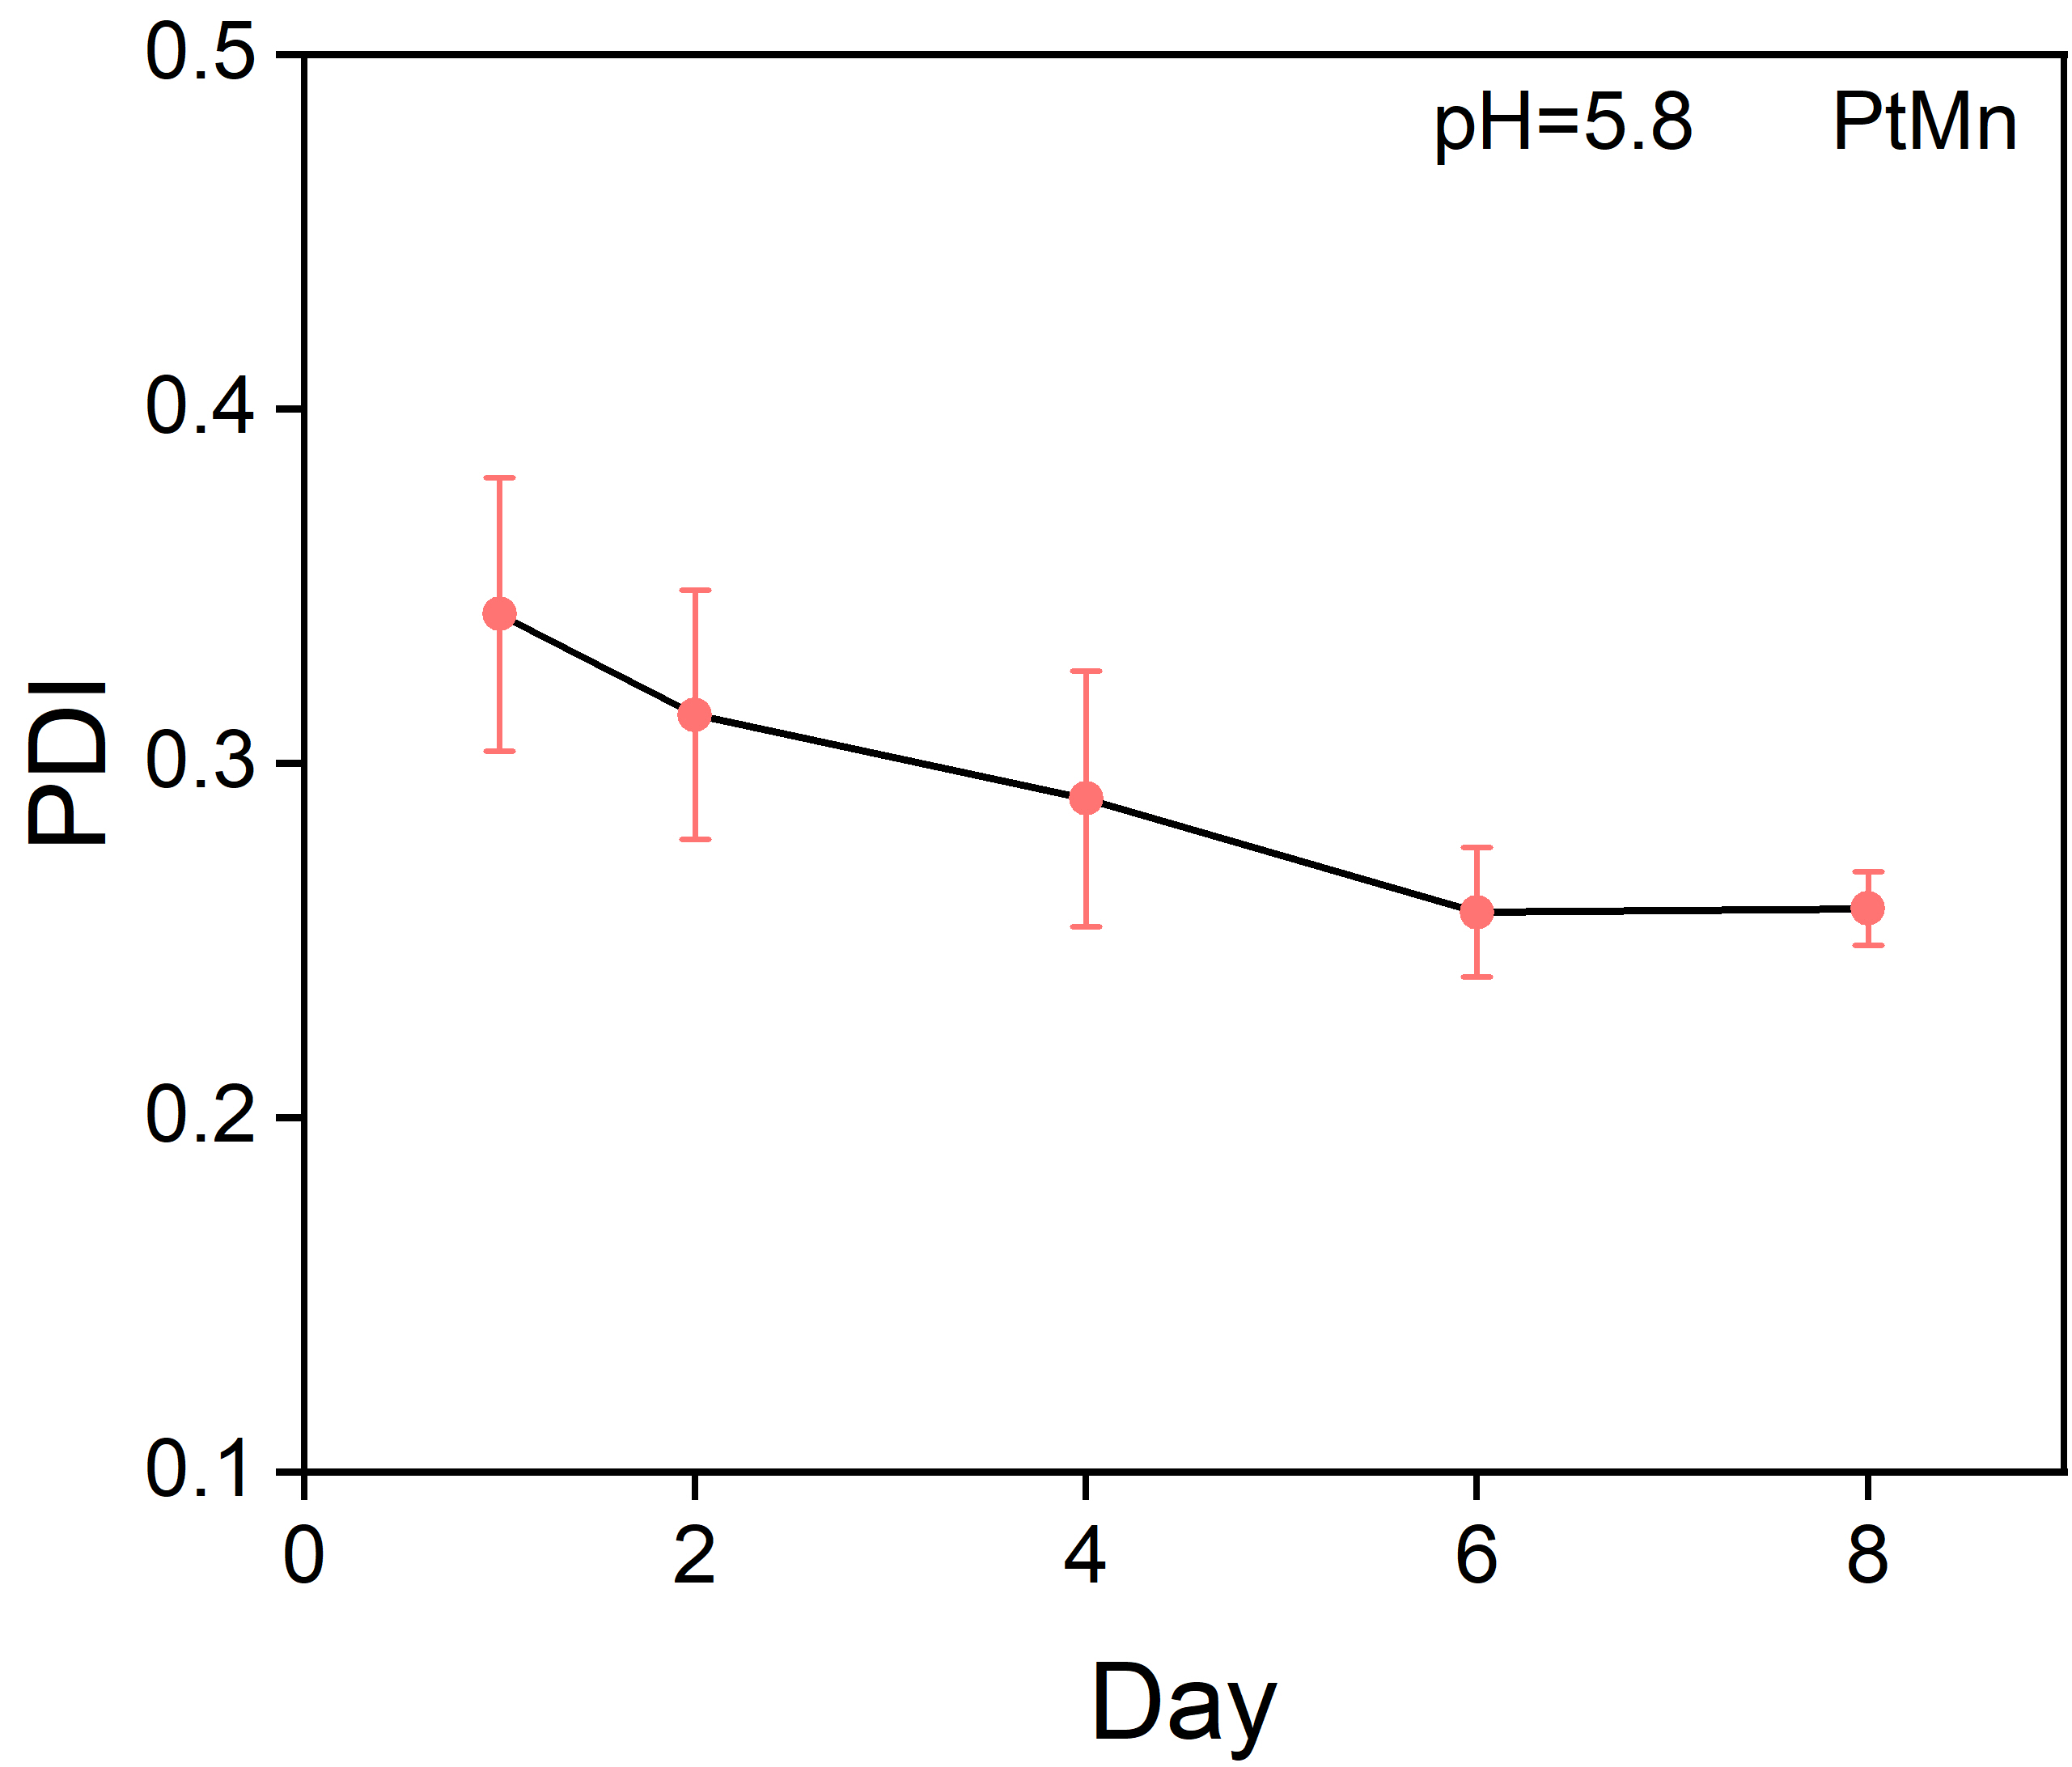
**

**Figure S2.** PDI of PtMn nanocubes at different times in an acidic condition.

**
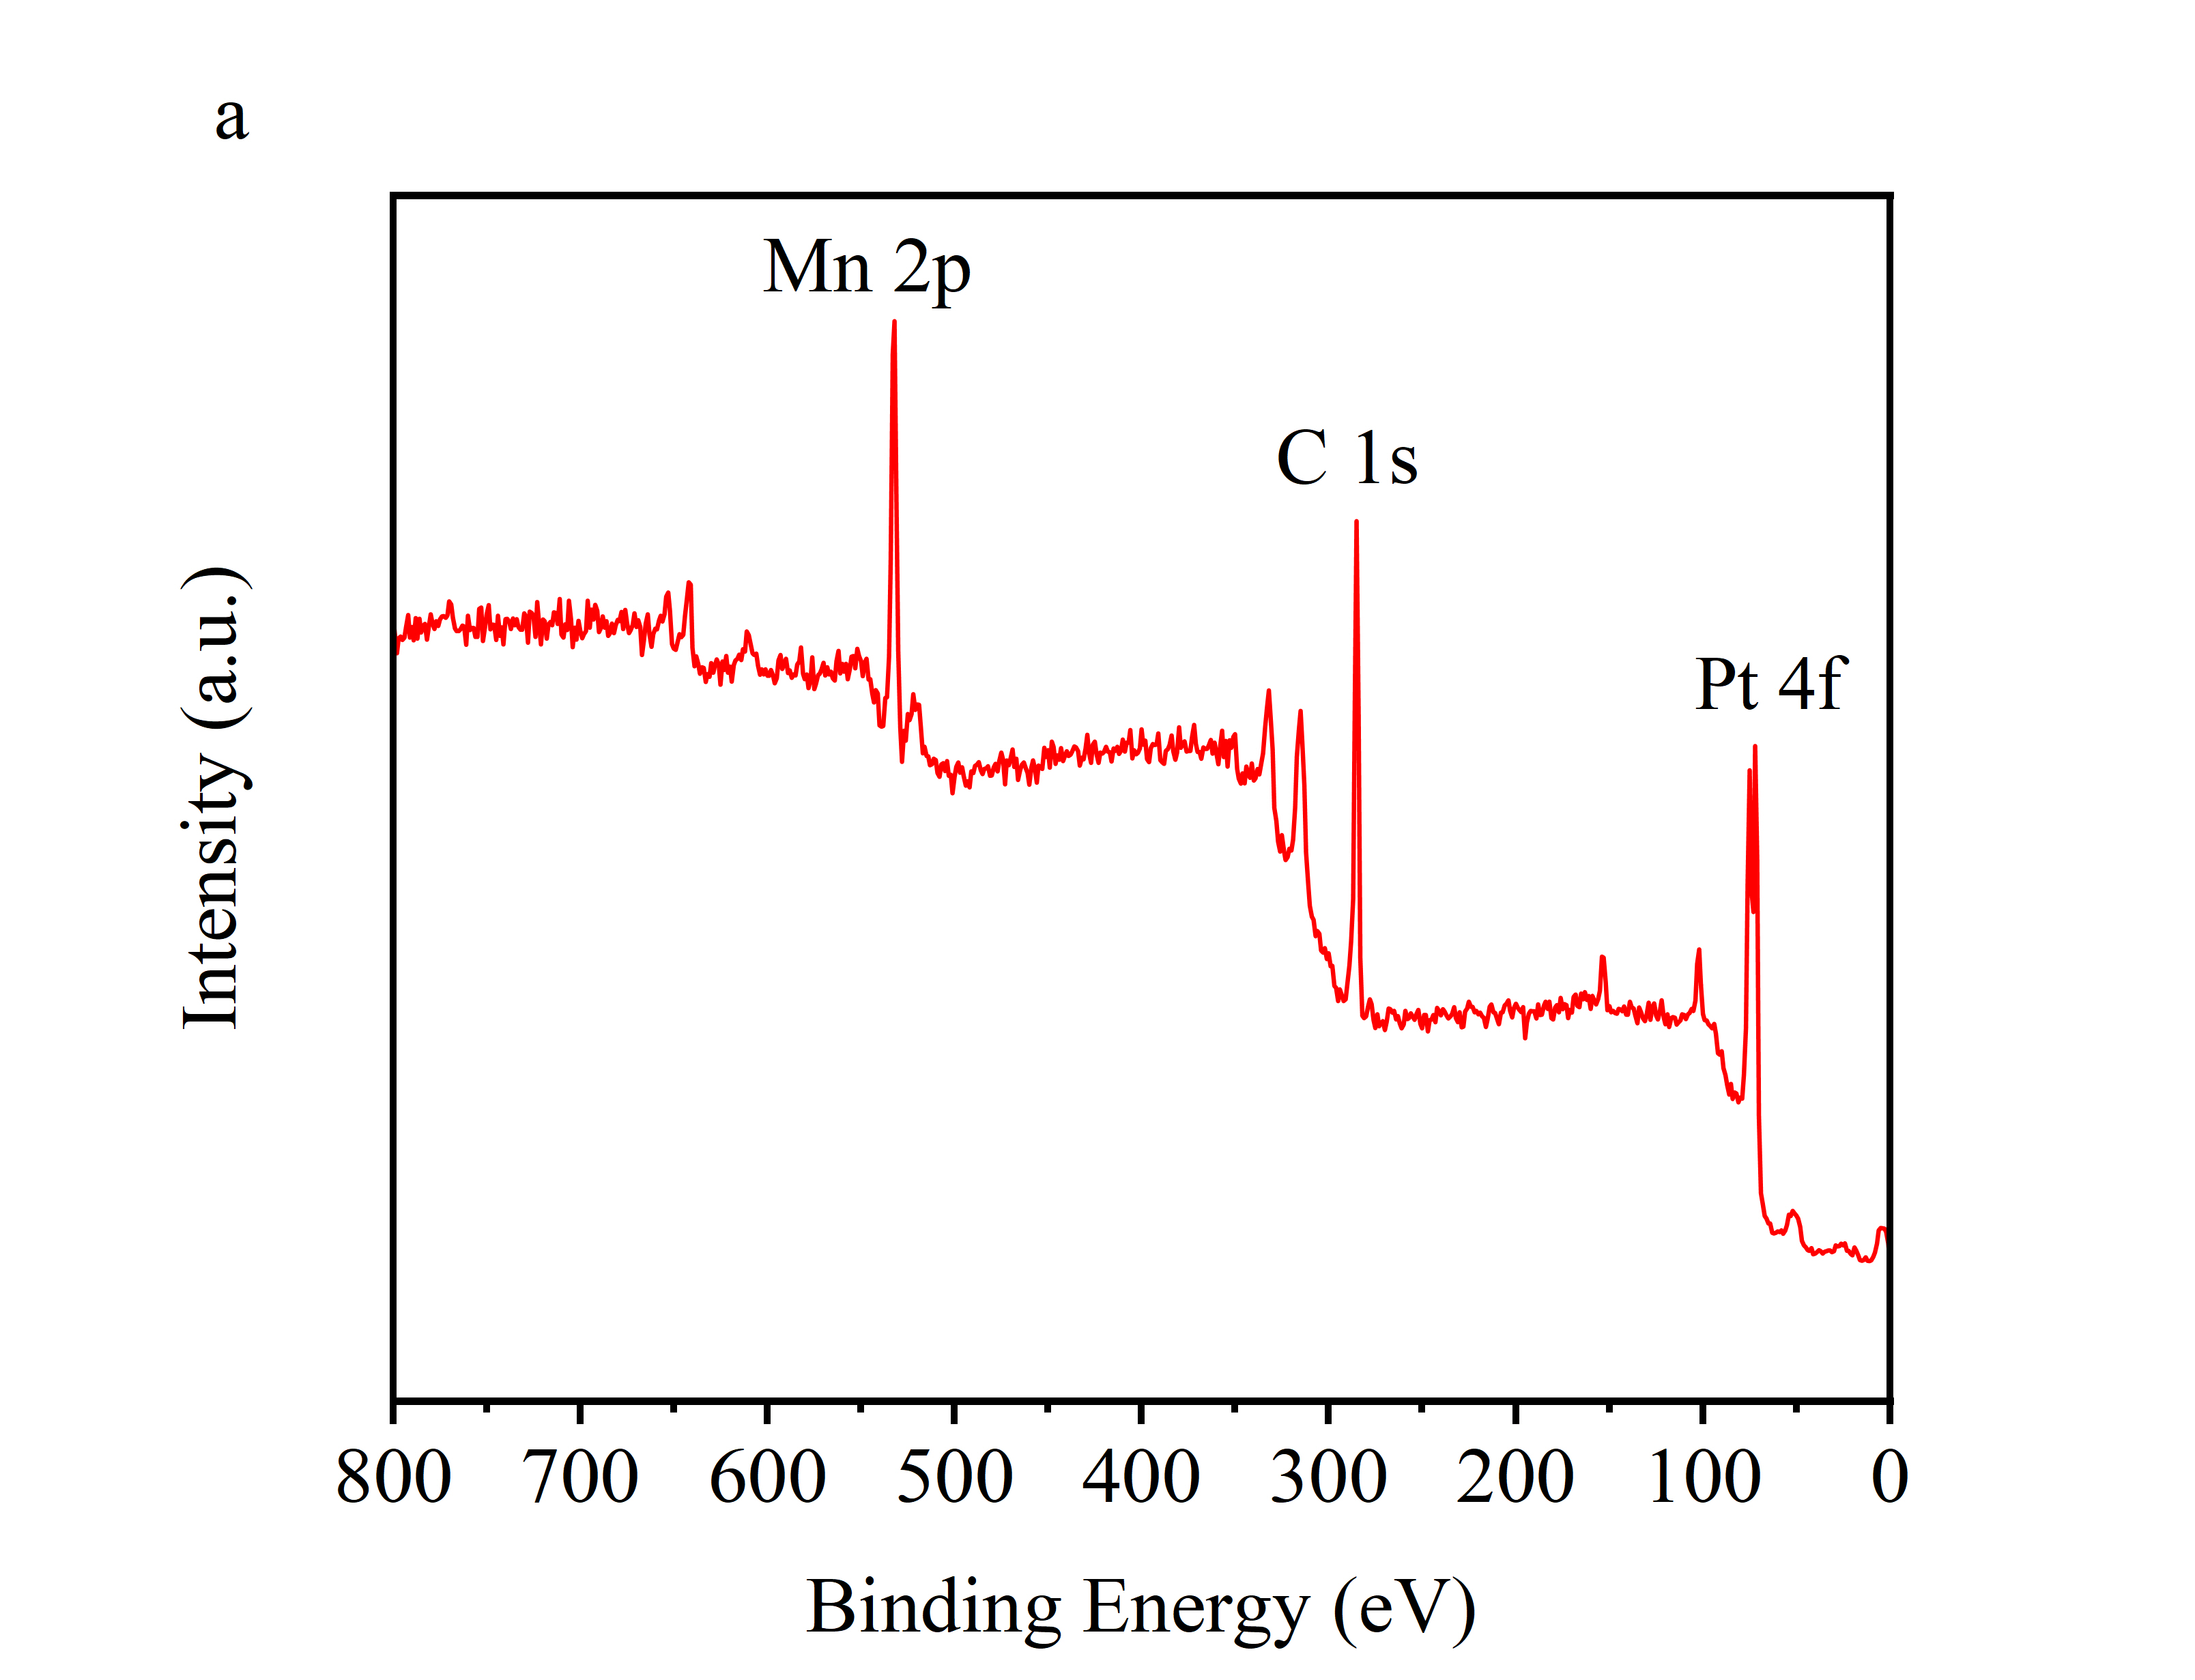

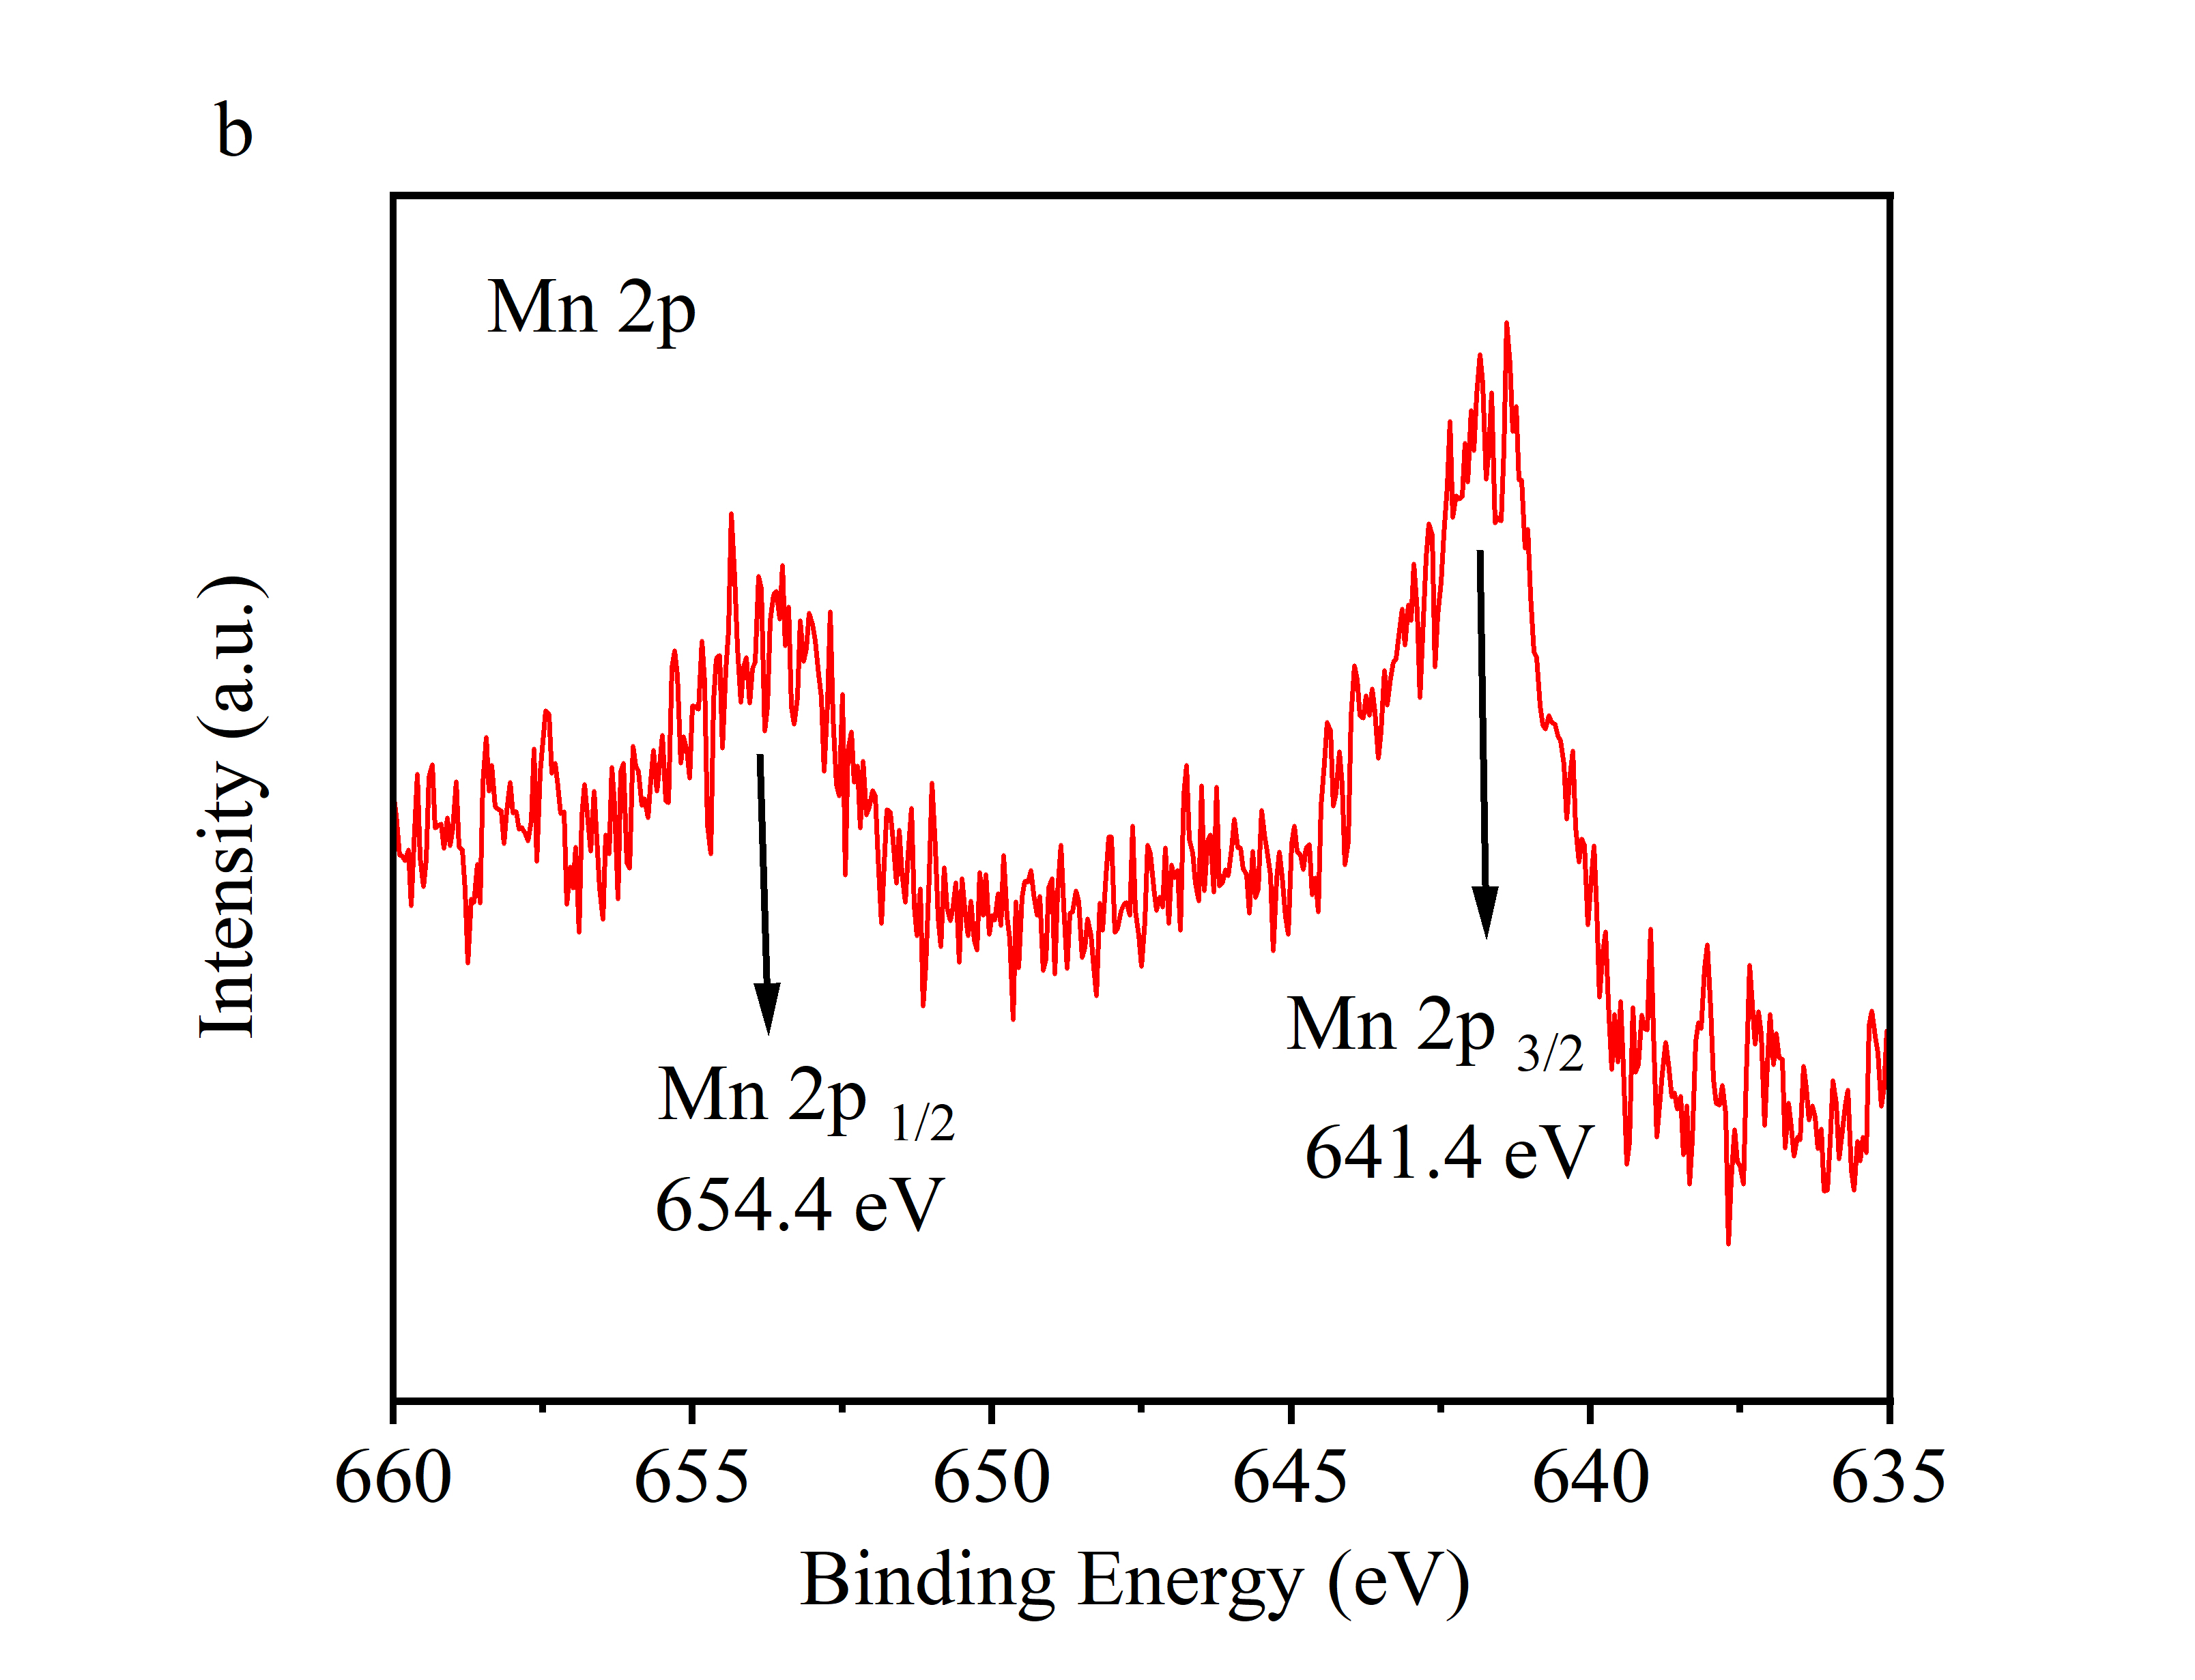
**

**Figure S3.** (a) Full XPS spectrum of PtMn nanocubes. (b) High-resolution XPS spectra of Mn 2p in PtMn nanocubes.


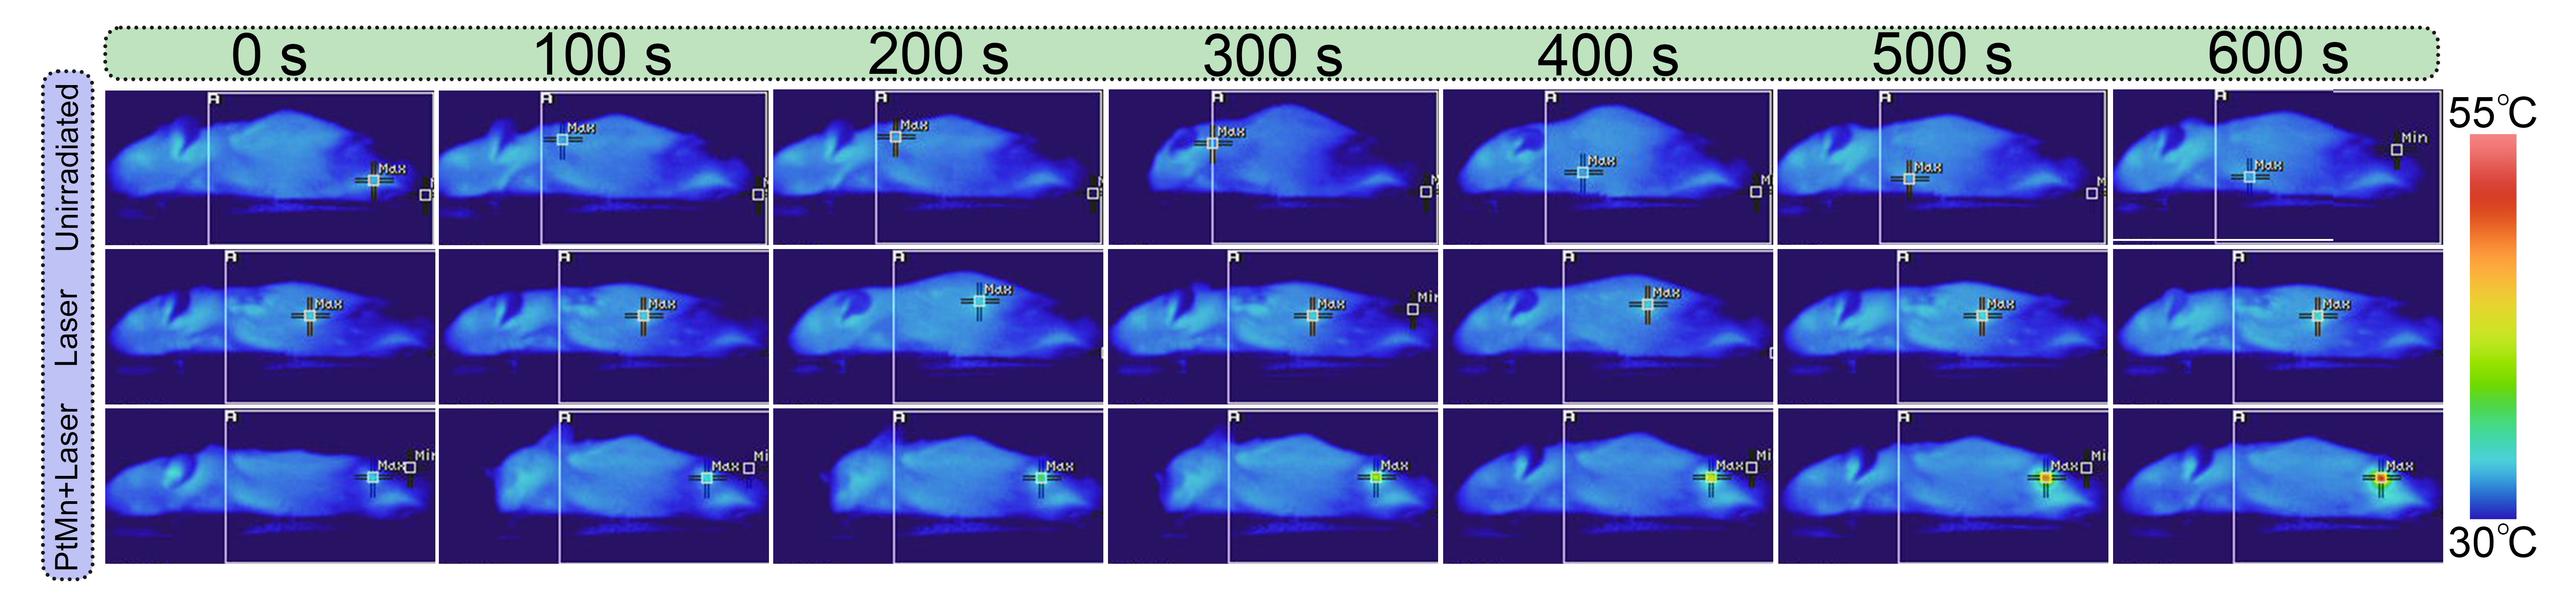


**Figure S4.** The photothermal images *in vivo* under different conditions.


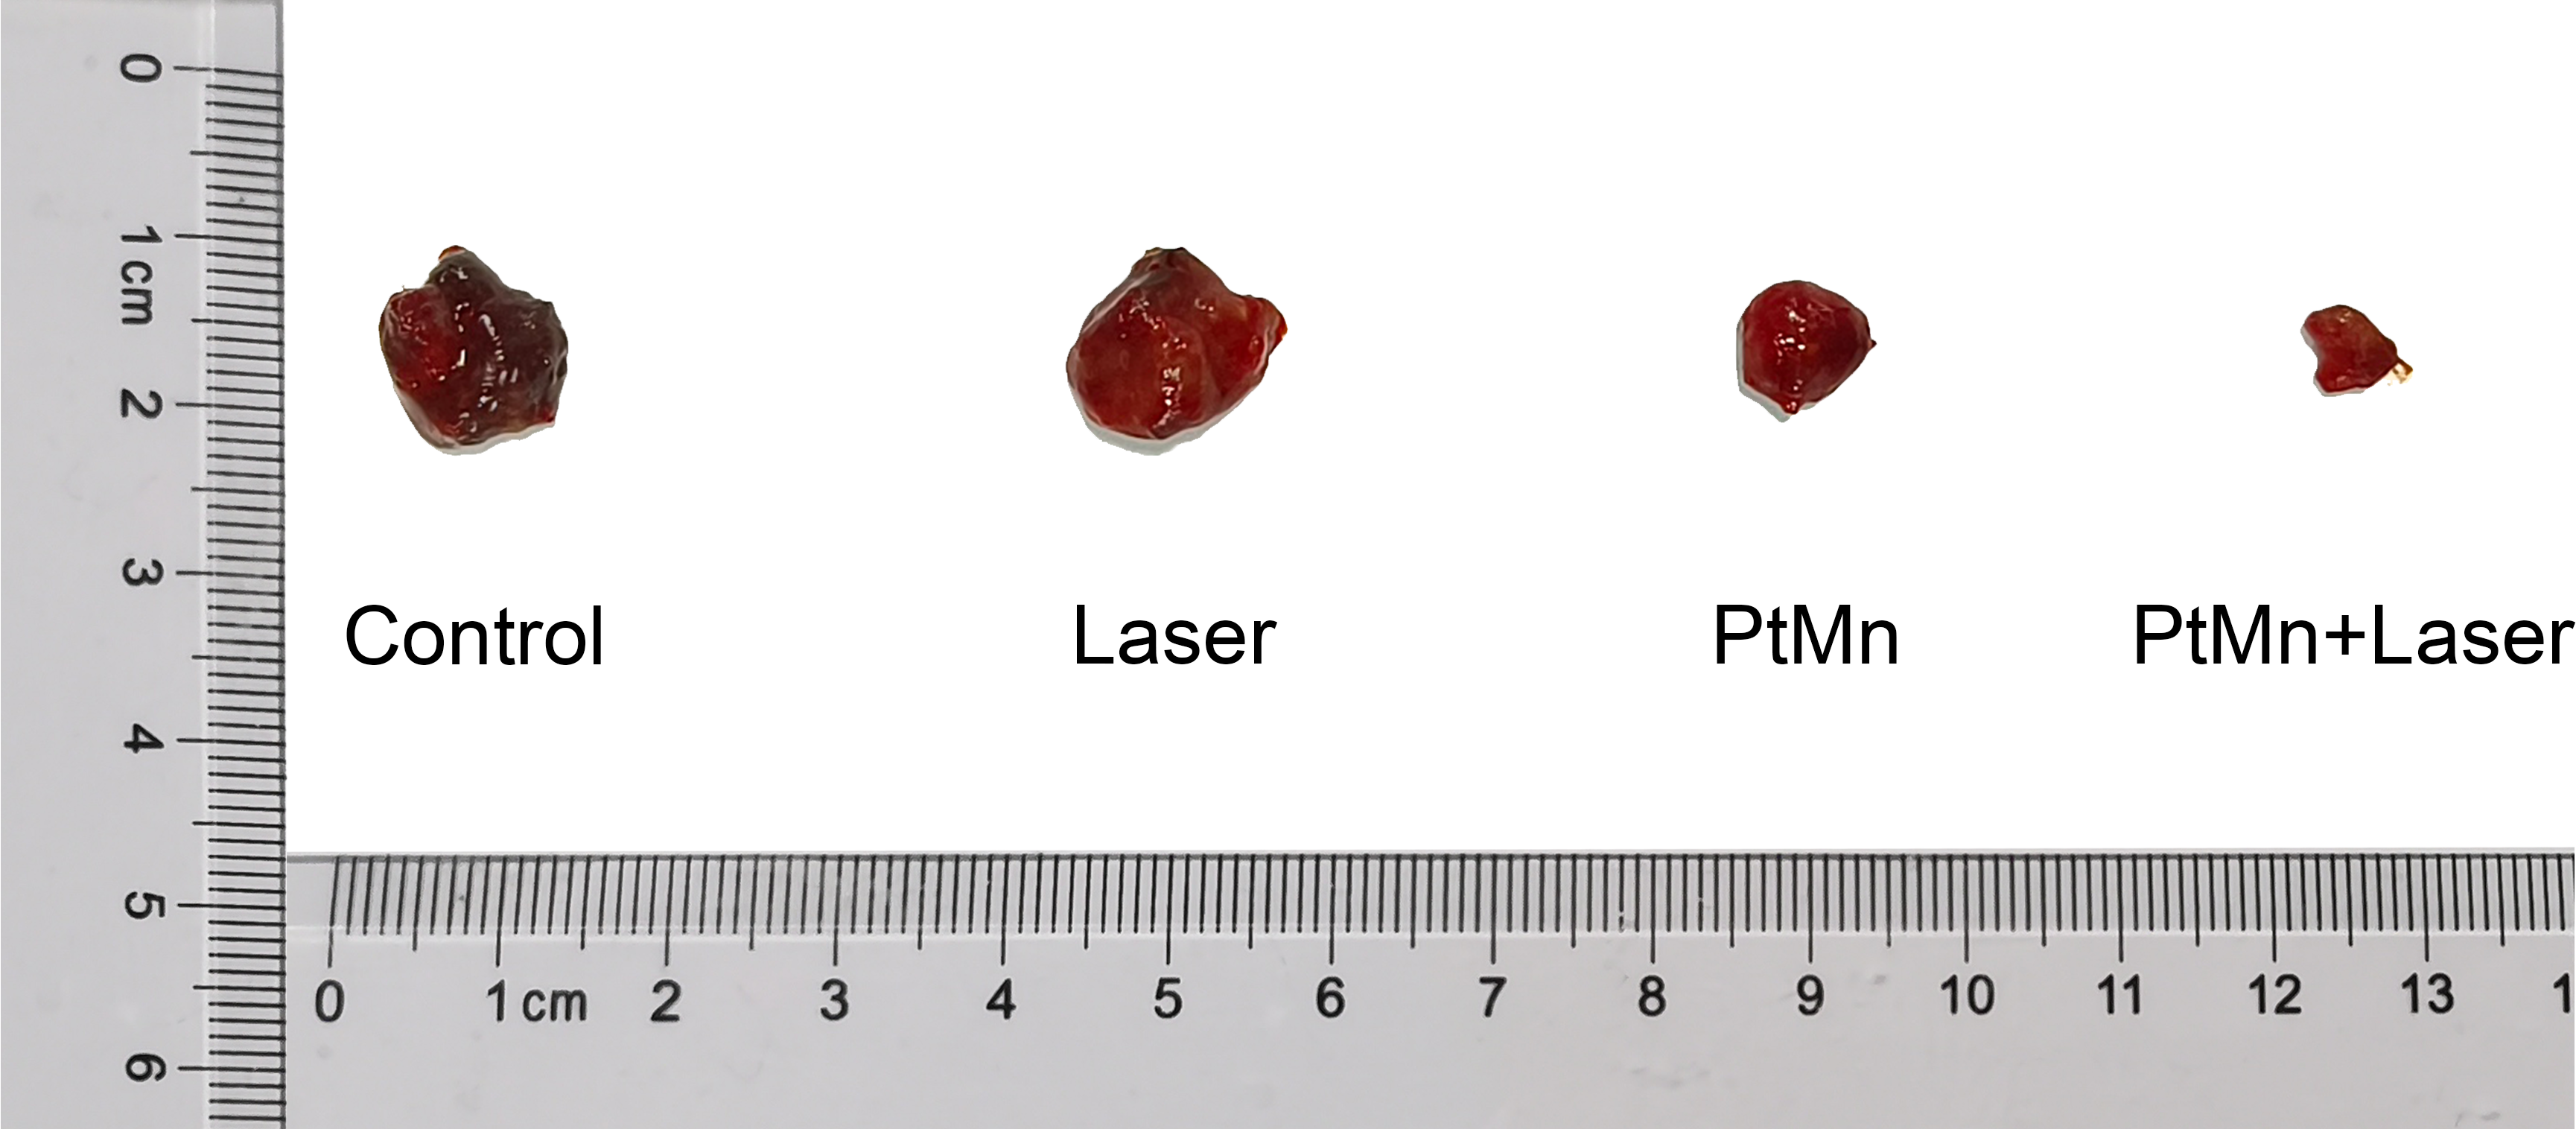


**Figure S5.** Representative photographs of tumors from each treatment group.

**
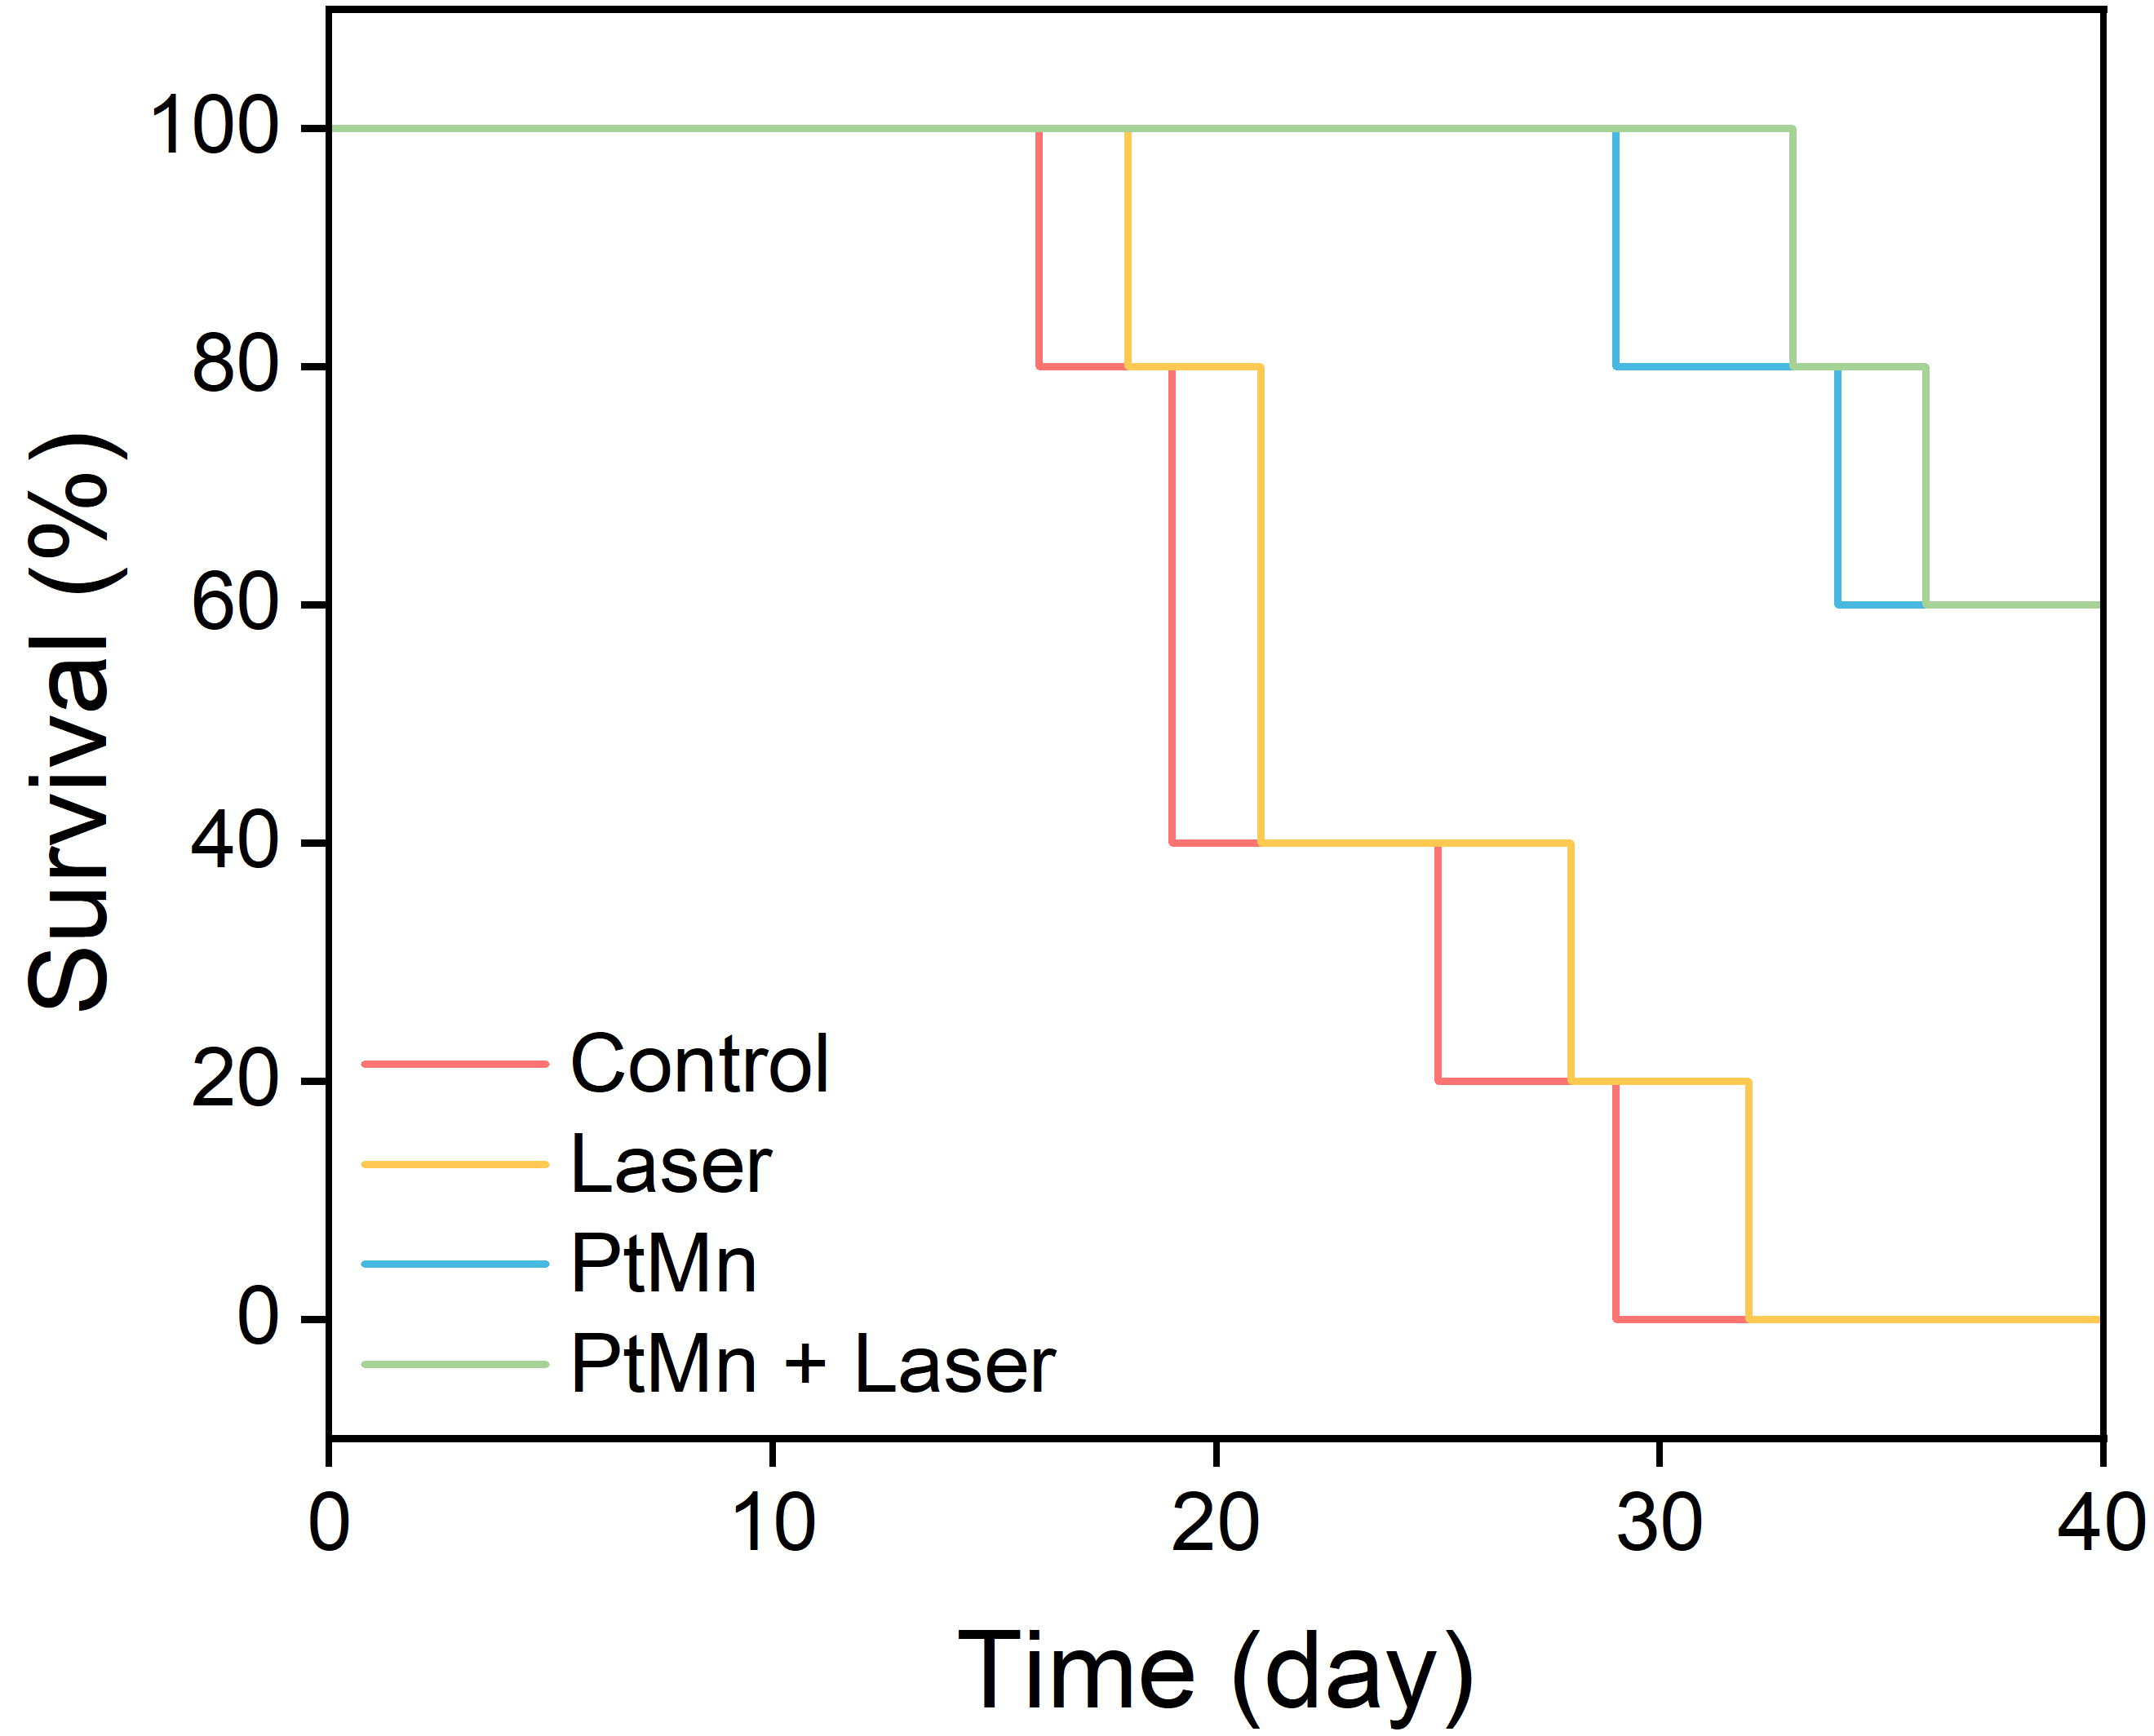
**

**Figure S6**. The survival rates of tumor-bearing mice with different treatments.
